# Supplementary material
Source: PubMed Central journal article supplement (PMC6378686)
Supplement: NIHMS1007740-supplement-Supplement.pdf [file NIHMS1007740-supplement-Supplement.pdf]

# THE LANCET

## Public Health

### Supplementary appendix

This appendix formed part of the original submission and has been peer reviewed. We post it as supplied by the authors. **This online publication has been corrected. The corrected version first appeared at [thelancet.com/public-health](http://thelancet.com/public-health) on April 6, 2017.**

Supplement to: Venkataramani AS, Shah SJ, O'Brien R, Kawachi I, Tsai AC.  
Health consequences of the US Deferred Action for Childhood Arrivals (DACA)  
immigration programme: a quasi-experimental study. *Lancet Public Health* 2017;  
published online March 14. [http://dx.doi.org/10.1016/S2468-2667\(17\)30047-6](http://dx.doi.org/10.1016/S2468-2667(17)30047-6).

**Supplemental Appendix for**

Health Consequences of Immigration Policy: Quasi-Experimental Evidence from the U.S.  
Deferred Action for Childhood Arrivals (DACA) Program

**Running Head:** Immigration Policy and Undocumented Migrant Health

**Authors:**

Atheendar S. Venkataramani, MD

Sachin J Shah, MD

Rourke O'Brien, PhD

Ichiro Kawachi, PhD

Alexander C. Tsai, MD

**Figure S1 – Study Sample and Inclusion Criteria**

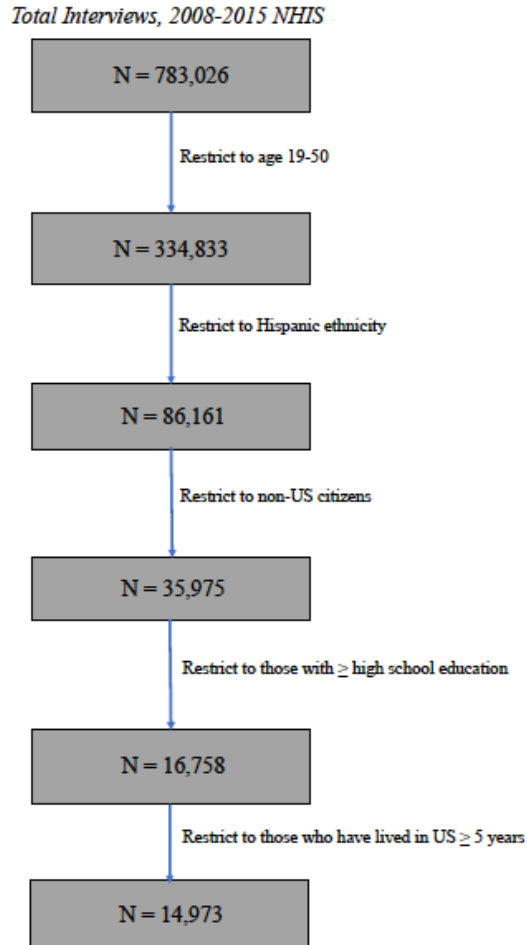

**Notes:** Figure displays changes in sample size after applying each restriction. The final sample size of 14,973 reflects all individuals in the analytic sample with measures of self-reported overall health. Of this group, a randomly selected third (5,035) were administered the K6.

**Table S1 – Model Estimates without NHIS Sample Weights**

|                                           | Self-Reported Health | Poor Health              | K6 Score            | Moderate or Greater Psychological Distress (K6 > 4) |
|-------------------------------------------|----------------------|--------------------------|---------------------|-----------------------------------------------------|
|                                           | <i>OLS</i>           | <i>Logit, Odds Ratio</i> | <i>Poisson, IRR</i> | <i>Logit, Odds Ratio</i>                            |
| <b>Panel A - Main Specification</b>       |                      |                          |                     |                                                     |
| Differences in Differences Estimate       | 0.025                | 1.06                     | 0.80                | 0.71                                                |
| 95% CI                                    | [-0.05, 0.099]       | [0.75, 1.49]             | [0.064, 0.99]       | [0.51, 0.99]                                        |
| <i>P-value</i>                            | <i>p=0.48</i>        | <i>p=0.75</i>            | <i>p=0.049</i>      | <i>p=0.047</i>                                      |
| N                                         | 14,973               | 14,973                   | 5,035               | 5,035                                               |
| <b>Panel B - Restrict to 2010-2015</b>    |                      |                          |                     |                                                     |
| Differences in Differences Estimate       | -0.0026              | 1.07                     | 0.78                | 0.68                                                |
|                                           | [-0.082, 0.081]      | [0.72, 1.57]             | [0.62, 0.99]        | [0.47, 0.99]                                        |
|                                           | <i>p=0.99</i>        | <i>p=0.72</i>            | <i>p=0.044</i>      | <i>p=0.041</i>                                      |
| N                                         | 11,714               | 11,714                   | 4,008               | 4,008                                               |
| <b>Panel C - Restrict to Under Age 40</b> |                      |                          |                     |                                                     |
| Differences in Differences Estimate       | -0.047               | 1.28                     | 0.83                | 0.71                                                |
|                                           | [-0.13, 0.04]        | [0.85, 1.93]             | [0.64, 1.07]        | [0.52, 1.12]                                        |
|                                           | <i>p=0.29</i>        | <i>p=0.23</i>            | <i>p=0.15</i>       | <i>p=0.17</i>                                       |
| N                                         | 8,726                | 8,726                    | 2,963               | 2,963                                               |
| <b>Panel D - Restrict to Less than HS</b> |                      |                          |                     |                                                     |
| Differences in Differences Estimate       | 0.016                | 1.11                     | 1.07                | 1.18                                                |
|                                           | [-0.08, 0.11]        | [0.85, 1.44]             | [0.76, 1.49]        | [0.80, 1.76]                                        |
|                                           | <i>p=0.72</i>        | <i>p=0.45</i>            | <i>p=0.67</i>       | <i>p=0.40</i>                                       |
| N                                         | 16,552               | 16,526                   | 5,686               | 5,686                                               |

**Notes:** Models are identical to those presented in Table 2 (Panel A of this table) and Table 3 (Panels B-D), except here we did not use NHIS sample weights. The estimation sample is noted in the Panel header. 95% CI in square brackets, with exact p-value in italics below. Estimator and interpretation of coefficient is provided in the column header. Poisson and OLS models utilize heteroskedasticity corrected standard errors in calculating confidence intervals. Displayed estimates reflects coefficients on the interaction between *Eligible* and *Post-Implementation*. All models include the main effect for *Eligible*, interview year-month fixed effects (which subsume the *Post-Implementation* term), and adjust for respondent age (at the time of policy), gender, fixed effects for years living in the US, and fixed effects for census region of residence.
